# Supplementary material
Source: publisher figshare collection journal article supplement (https://acs.figshare.com/ndownloader/files/5909226)
Supplement: Supplementary file 1 [file 5909226]

## Supporting information

### Single Component Lanthanide Hybrids Based on Metal–Organic Framework Phosphor for Near-Ultraviolet White Light LED

Yan-Wu Zhao<sup>†</sup>, Fu-Qiang Zhang<sup>†</sup>, and Xian-Ming Zhang<sup>†‡\*</sup>

*<sup>†</sup>School of Chemistry & Material Science, Shanxi Normal University Linfen  
041004, P. R. China.*

*<sup>‡</sup>Institute of crystalline materials, Shanxi University, Taiyuan 030006, P. R. China*

Correspondence to: zhangxm@dns.sxnu.edu.cn.

#### Contents

|                                                                                            |      |
|--------------------------------------------------------------------------------------------|------|
| Section S1 Energy levels of Calculation with free ligand.....                              | S-2  |
| Section S2 ICP analysis of doping LnMOF.....                                               | S-4  |
| Section S3 Single crystal data and structure plots.....                                    | S-5  |
| Section S4 PXRD patterns and IR spectra of partial MOF.....                                | S-8  |
| Section S5 EDS spectrum of the doping LnMOF.....                                           | S-9  |
| Section S6 TGA of Gd(CPOMBA)(H <sub>2</sub> O) <sub>2</sub> ·nH <sub>2</sub> O.....        | S-10 |
| Section S7 Excitation and Emission spectra of free ligand, single and doping<br>LnMOF..... | S-11 |
| Section S8 CIE coordinates of doping LnMOF.....                                            | S-14 |
| Section S9 Photoluminescent decay curve of doping LnMOF.....                               | S-16 |
| Section S10 quantum yield of doping LnMOF.....                                             | S-18 |
| Section S11 Photographs of LEDs and optical photographs of crystal.....                    | S-19 |
| Section S12 Fabrication of UV WLED.....                                                    | S-20 |
| References.....                                                                            | S-21 |

## Section S1. Energy levels of Calculation with free ligand

### Energy levels of Calculation

1. Triplet excited state calculation: the molecular geometry of free ligand H<sub>3</sub>CPOMBA was optimized by using Gaussian09 software at the B3LYP/6-31G\* level, as shown in Figure S12. The energy of the lowest triplet excited state of H<sub>3</sub>CPOMBA was calculated to be 2.873595 eV ( ${}^3\pi\pi^* = 23177\text{ cm}^{-1}$ ) using the time-dependent DFT approach<sup>1</sup>.

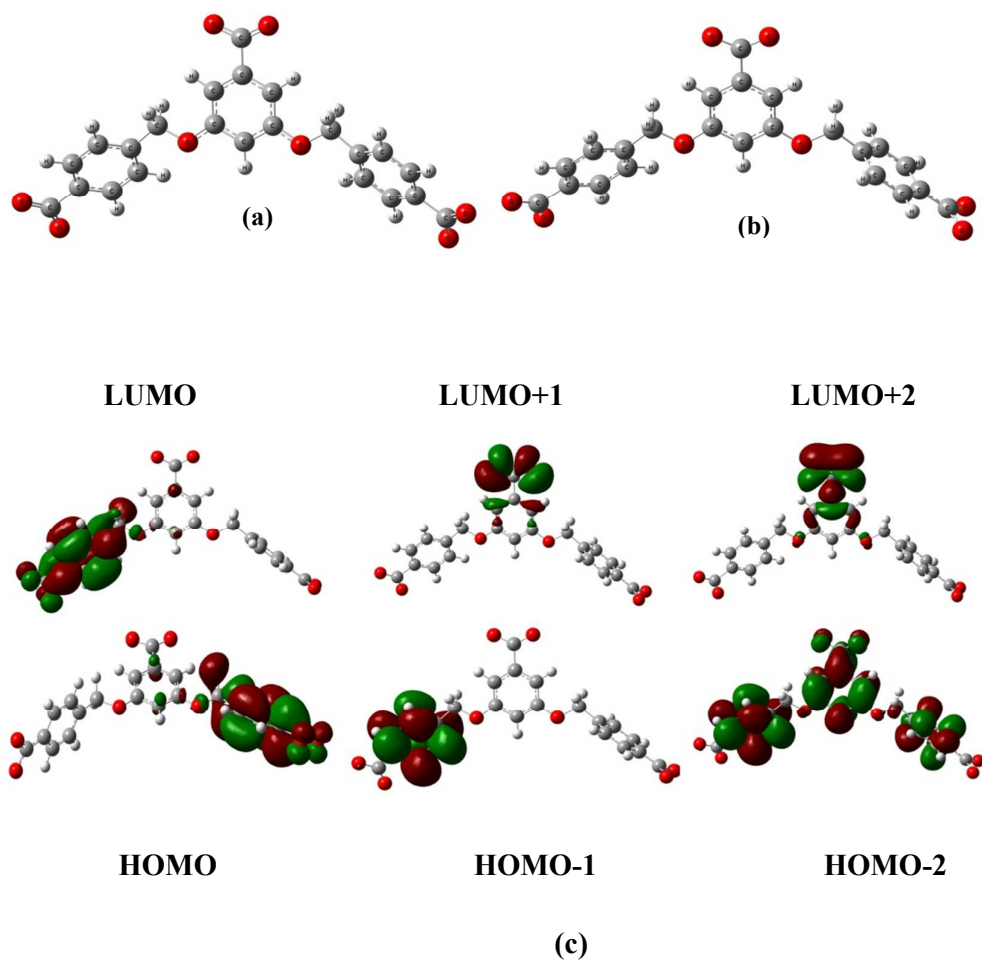

**Figure S1.** (a) Optimized molecular geometry of free ligand H<sub>3</sub>CPOMBA at the ground state; (b) optimized molecular geometry of free ligand H<sub>3</sub>CPOMBA at the lowest triplet excited state; (c) Contour plots of the frontier orbitals of free ligand H<sub>3</sub>CPOMBA at the lowest triplet excited state.

2. The singlet ( $^1\pi\pi^*$ ) energy levels of H<sub>3</sub>CPOMBA (331nm,  $^1\pi\pi^* = 30215\text{ cm}^{-1}$ ) is estimated by referring to its wavelengths of UV-vis absorbance edges

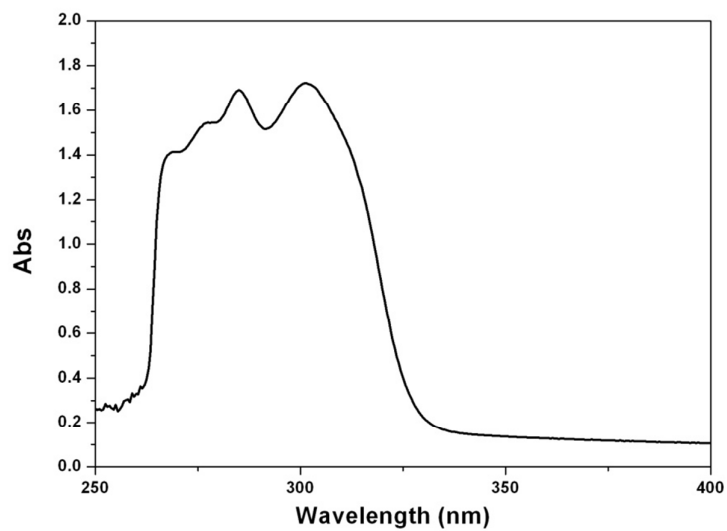

**Figure S2.** UV absorption spectra of the H<sub>3</sub>CPOMBA in DMF solution.

## Section S2. ICP analysis of doping LnMOF

**Instrumentation:** The analytical measurements were made with an ICP OES, model Optima 8000 DV (Perkin-Elmer), equipped with a solid-state segmented double-CCD detectors, an Echelle grating, a peristaltic pump, a crossflow nebulizer coupled to a Scott spray chamber, and a plasma torch. The operational parameters used for the analytical measurements were radio frequency power of 1300 W, nebulization flow rate of 0.8 L/min, auxiliary argon flow rate of 0.5 L/min, plasma argon flow rate of 15.0 L/min, sample flow rate of 1.0 L/min, and read delay of 30 s.

**Table S1.** The molar ratio of the Tb/Eu in  $\text{Eu}_{0.045}\text{Tb}_{0.955}\text{CPOMBA}$  and La/Eu/Tb in  $\text{La}_{0.6}\text{Eu}_{0.1}\text{Tb}_{0.3}\text{CPOMBA}$  product by ICP analysis.

| sample                                                       | The molar ratio of the starting<br>Tb/Eu (or La/Eu/Tb) salt | The ratio by ICP<br>analysis |
|--------------------------------------------------------------|-------------------------------------------------------------|------------------------------|
| $\text{Eu}_{0.045}\text{Tb}_{0.955}\text{CPOMBA}$            | Eu/Tb      0.045:0.955                                      | 0.044:0.956                  |
| $\text{La}_{0.6}\text{Eu}_{0.1}\text{Tb}_{0.3}\text{CPOMBA}$ | La/Eu/Tb    0.6:0.1:0.3                                     | 0.612:0.10:0.298             |

### Section S3. Single crystal data and Structural plots

**Table S2.** Cell parameters of LnCPOMBA (Ln = La<sup>3+</sup>, Ce<sup>3+</sup>, Pr<sup>3+</sup>, Nd<sup>3+</sup>, Sm<sup>3+</sup>, Eu<sup>3+</sup>, Gd<sup>3+</sup>, Tb<sup>3+</sup>, Ho<sup>3+</sup>, Er<sup>3+</sup>, and Tm<sup>3+</sup>) and co-doped complexes Eu<sub>0.045</sub>Tb<sub>0.955</sub>CPOMBA (**1**) and La<sub>0.6</sub>Eu<sub>0.1</sub>Tb<sub>0.3</sub>CPOMBA (**2**).

| Compound         | <i>a</i> (Å) | <i>b</i> (Å) | <i>c</i> (Å) | $\alpha$ | $\beta$     | $\gamma$ | <i>V</i> (Å <sup>3</sup> ) |
|------------------|--------------|--------------|--------------|----------|-------------|----------|----------------------------|
| LaCPOMBA         | 13.69(8)     | 24.01(11)    | 8.43(5)      | 90       | 104.75(2)   | 90       | 2698(2)                    |
| CeCPOMBA         | 13.74(6)     | 23.97(7)     | 8.48(3)      | 90       | 104.591(6)  | 90       | 2711(3)                    |
| PrCPOMBA         | 13.71(5)     | 24.11(10)    | 8.51(2)      | 90       | 104.12(9)   | 90       | 2702(3)                    |
| NdCPOMBA         | 13.59(3)     | 23.59(9)     | 8.54(3)      | 90       | 104.38(6)   | 90       | 2689(2)                    |
| SmCPOMBA         | 13.61(5)     | 24.05(4)     | 8.59(6)      | 90       | 104.71(10)  | 90       | 2718(2)                    |
| EuCPOMBA         | 13.78(9)     | 24.104(14)   | 8.44(5)      | 90       | 104.833(11) | 90       | 2709(3)                    |
| GdCPOMBA         | 13.86(19)    | 24.088(3)    | 8.43(12)     | 90       | 104.557(2)  | 90       | 2723.5(7)                  |
| TbCPOMBA         | 13.80(11)    | 24.032(19)   | 8.45(7)      | 90       | 104.521(2)  | 90       | 2712.6(4)                  |
| HoCPOMBA         | 13.72(2)     | 23.99(2)     | 8.47(13)     | 90       | 104.73(14)  | 90       | 2697(2)                    |
| ErCPOMBA         | 13.74(14)    | 23.98(2)     | 8.44(9)      | 90       | 104.52(9)   | 90       | 2692(1)                    |
| TmCPOMBA         | 13.79(10)    | 23.90(18)    | 8.41(7)      | 90       | 104.255(10) | 90       | 2687.8(4)                  |
| Complex <b>1</b> | 13.77(10)    | 24.12(6)     | 8.51(6)      | 90       | 104.634(5)  | 90       | 2710(3)                    |
| Complex <b>2</b> | 13.68(9)     | 23.98(8)     | 8.49(8)      | 90       | 104.558(6)  | 90       | 2705(3)                    |

**Table S3.** Crystal data and structural refinement for compound LnCPOMBA ( Ln= Eu<sup>3+</sup>, Gd<sup>3+</sup>, Tb<sup>3+</sup> and Tm<sup>3+</sup> ).

| compound                                                  | EuCPOMBA                                          | TbCPOMBA                                          | TmCPOMBA                                          | GdCPOMBA                                          |
|-----------------------------------------------------------|---------------------------------------------------|---------------------------------------------------|---------------------------------------------------|---------------------------------------------------|
| Formula                                                   | C <sub>23</sub> H <sub>19</sub> EuO <sub>10</sub> | C <sub>23</sub> H <sub>19</sub> TbO <sub>10</sub> | C <sub>23</sub> H <sub>19</sub> TmO <sub>10</sub> | C <sub>23</sub> H <sub>19</sub> GdO <sub>10</sub> |
| Formula weight                                            | 607.34                                            | 614.30                                            | 624.31                                            | 612.63                                            |
| T (K)                                                     | 293(2)                                            | 293(2)                                            | 293(2)                                            | 298(2)                                            |
| Crystal system                                            | monoclinic                                        | monoclinic                                        | monoclinic                                        | monoclinic                                        |
| Space group                                               | C2/m                                              | C2/m                                              | C2/m                                              | C2/m                                              |
| Wavelength (Å)                                            | 0.71073                                           | 0.71073                                           | 0.71073                                           | 0.71073                                           |
| <i>a</i> (Å)                                              | 13.78(9)                                          | 13.8044(11)                                       | 13.7892(10)                                       | 13.8599(19)                                       |
| <i>b</i> (Å)                                              | 24.104(14)                                        | 24.0322(19)                                       | 23.8999(18)                                       | 24.088(3)                                         |
| <i>c</i> (Å)                                              | 8.437(5)                                          | 8.4465(7)                                         | 8.4148(7)                                         | 8.4281(12)                                        |
| $\alpha$ (°)                                              | 90                                                | 90                                                | 90                                                | 90                                                |
| $\beta$ (°)                                               | 104.833(11)                                       | 104.521(2)                                        | 104.2550(10)                                      | 104.557(2)                                        |
| $\gamma$ (°)                                              | 90                                                | 90                                                | 90                                                | 90                                                |
| V(Å <sup>3</sup> )                                        | 2709(3)                                           | 2712.6(4)                                         | 2687.8(4)                                         | 2723.5(6)                                         |
| <i>Z</i>                                                  | 4                                                 | 4                                                 | 4                                                 | 4                                                 |
| <i>D</i> <sub>calc</sub> (g cm <sup>-3</sup> )            | 1.489                                             | 1.504                                             | 1.543                                             | 1.484                                             |
| $\mu$ (mm <sup>-1</sup> )                                 | 2.363                                             | 2.654                                             | 3.349                                             | 2.482                                             |
| <i>F</i> (000)                                            | 1200.0                                            | 1208.0                                            | 1224.0                                            | 1188.0                                            |
| GOF on F <sup>2</sup>                                     | 1.040                                             | 1.137                                             | 1.116                                             | 1.166                                             |
| Final R                                                   | R <sub>1</sub> <sup>a</sup> = 0.0780              | R <sub>1</sub> <sup>a</sup> = 0.0578              | R <sub>1</sub> <sup>a</sup> = 0.0559              | R <sub>1</sub> <sup>a</sup> = 0.0531              |
| wR <sub>2</sub> <sup>b</sup> [ <i>I</i> > 2σ( <i>I</i> )] | 0.2131                                            | 0.1682                                            | 0.1648                                            | 0.1603                                            |

$$^a R_1 = \sum ||F_o| - |F_c|| / \sum |F_o|; \quad ^b wR_2 = [\sum w(F_o^2 - F_c^2)^2 / \sum w(F_o^2)^2]^{1/2}.$$

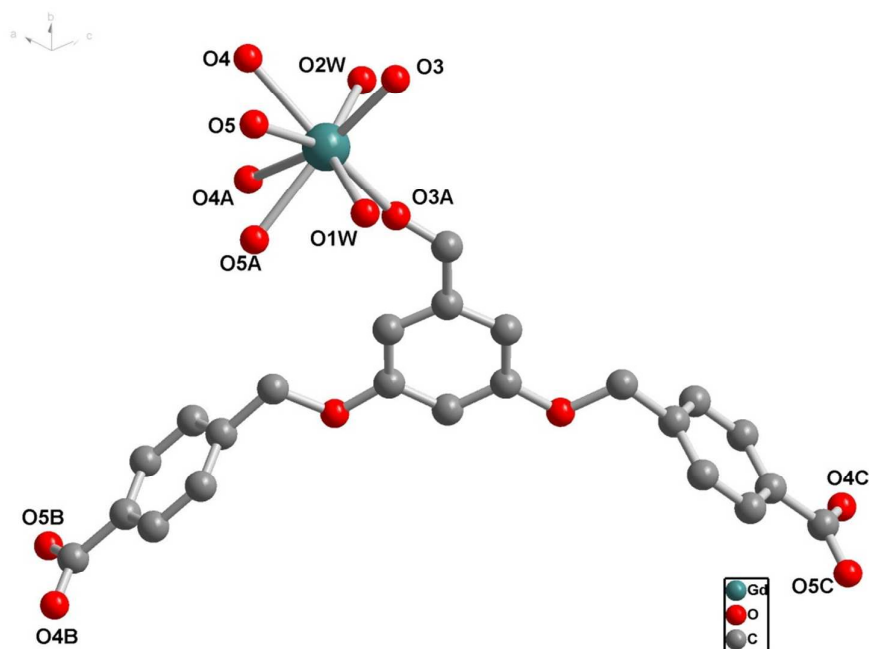

**Figure S3.** Representation of the La(III) coordination environments of compound  $\text{Gd}(\text{CPOMBA})(\text{H}_2\text{O})_2 \cdot n\text{H}_2\text{O}$ . Symmetry operation: A)  $x, 1-y, z$ ; B)  $0.5-x, -0.5+y, 1-z$ ; C)  $-0.5+x, -0.5+y, 1+z$ . All carbon H atoms and lattice solvent molecules are omitted for clarity

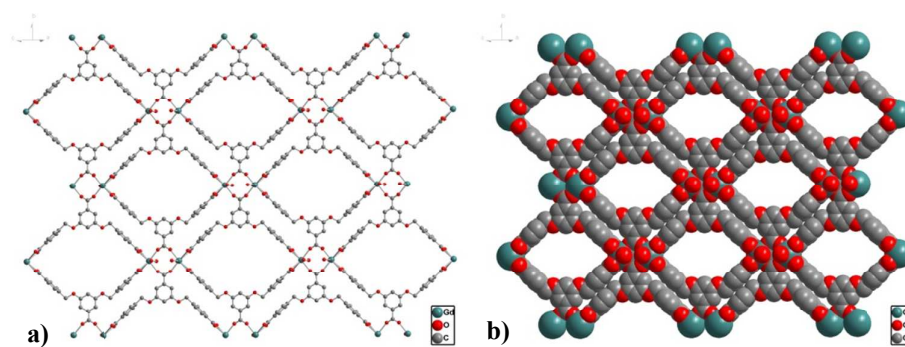

**Figure S4.** a) 2D layer structure of  $\text{Gd}(\text{CPOMBA})(\text{H}_2\text{O})_2 \cdot n\text{H}_2\text{O}$ . H atoms were omitted for clarity. b) Space-filling representation of the 2D structure.

#### Section S4. PXRD patterns and IR spectra of partial MOF

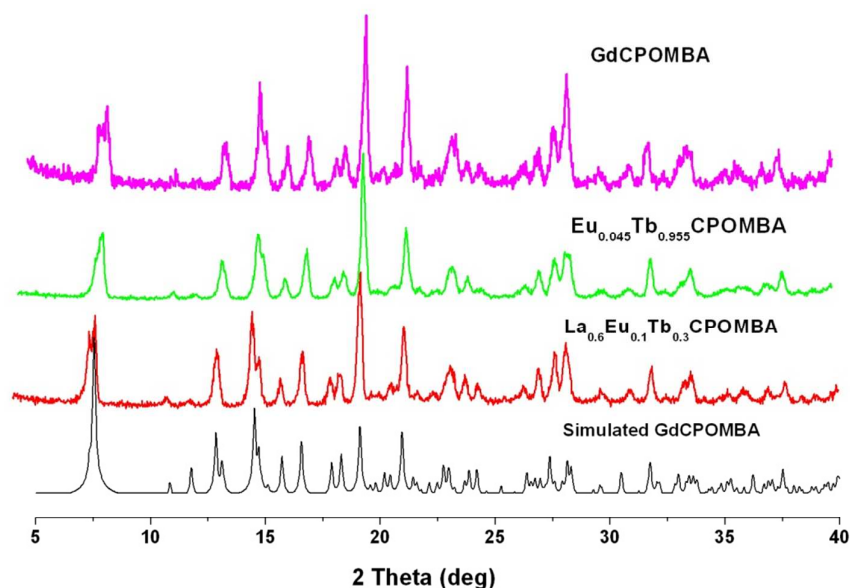

**Figure S5.** Powder X-ray diffraction patterns of simulated  $\text{Gd}(\text{CPOMBA})(\text{H}_2\text{O})_2 \cdot n\text{H}_2\text{O}$  and as-synthesized  $\text{Gd}(\text{CPOMBA})(\text{H}_2\text{O})_2 \cdot n\text{H}_2\text{O}$ ,  $\text{Eu}_{0.045}\text{Tb}_{0.955}\text{CPOMBA}$  and  $\text{La}_{0.6}\text{Eu}_{0.1}\text{Tb}_{0.3}\text{CPOMBA}$ .

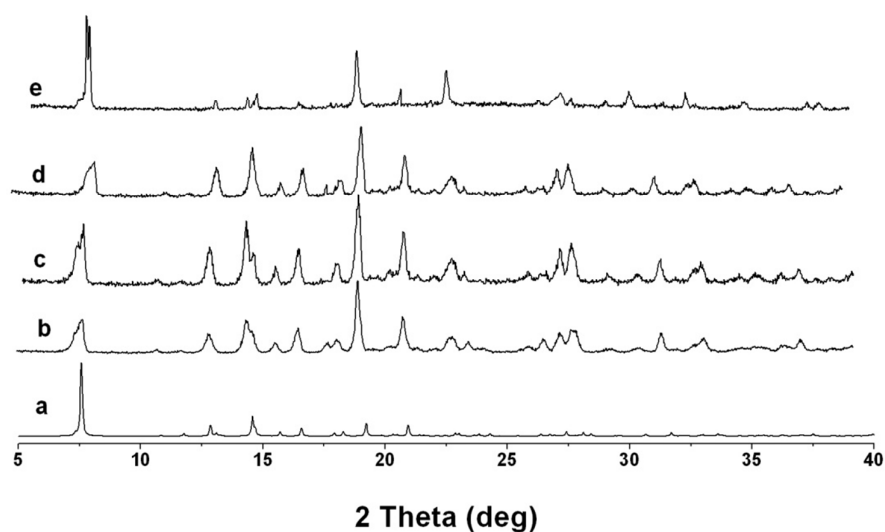

**Figure S6.** X-ray powder patterns of  $\text{Eu}_{0.045}\text{Tb}_{0.955}\text{CPOMBA}$ : a) calculation from the single-crystal structure of  $\text{Eu}(\text{CPOMBA})(\text{H}_2\text{O})_2 \cdot n\text{H}_2\text{O}$ ; b) an as-made



sample of  $\text{Eu}_{0.045}\text{Tb}_{0.955}\text{CPOMBA}$  at Rt; c) sample from (b) after treatment at 100 °C for 24 h; d) sample from (b) after treatment in boiling water for 24 h; e) sample from (b) after treatment at 150 °C for 48 h.

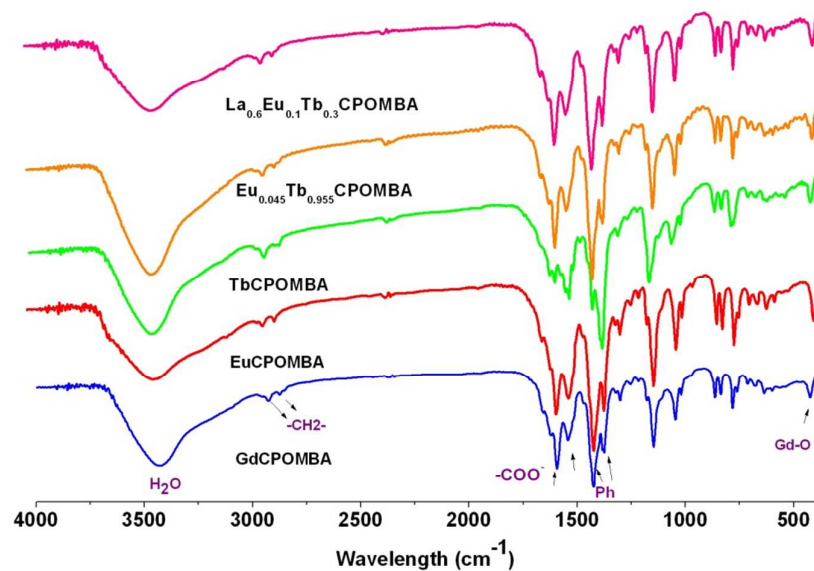

**Figure S7.** IR spectra of various  $\text{Ln}(\text{CPOMBA})(\text{H}_2\text{O})_2$  MOFs.

#### Section S5. EDS spectrum of the doping LnMOF

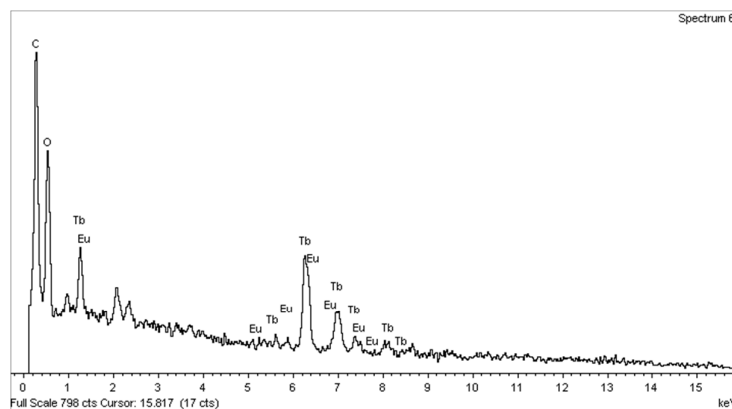

**(a)**

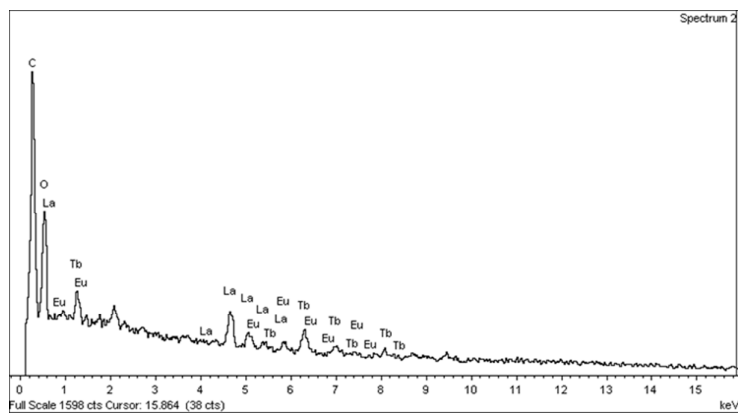

(b)

**Figure S8.** (a) EDS spectrum of  $\text{Eu}_{0.045}\text{Tb}_{0.955}\text{CPOMBA}$  and (b)  $\text{La}_{0.6}\text{Eu}_{0.1}\text{Tb}_{0.3}\text{CPOMBA}$  (bottom) acquired in SEM.

#### Section S6. Thermal gravimetric analysis of $\text{Gd}(\text{CPOMBA})(\text{H}_2\text{O})_2 \cdot n\text{H}_2\text{O}$

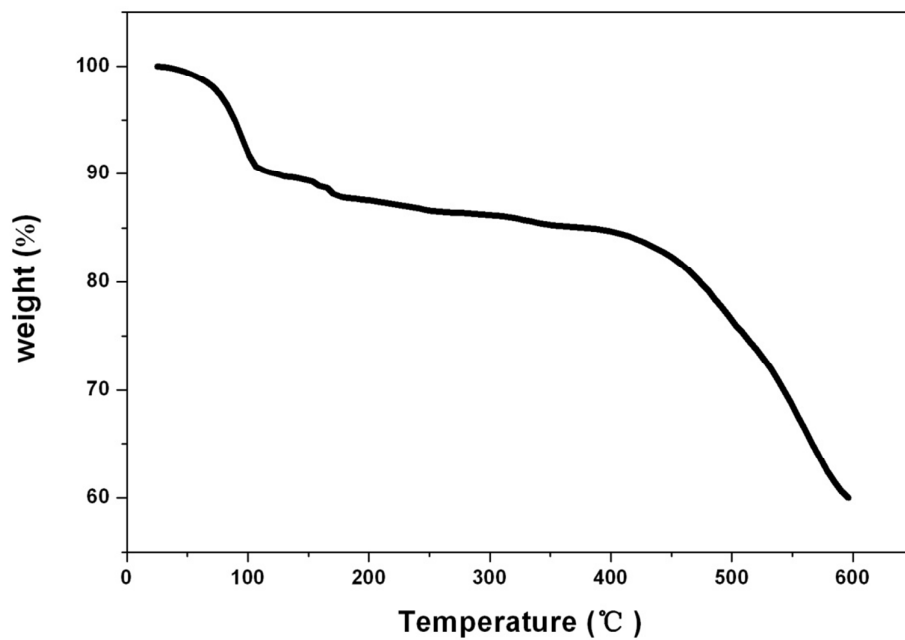

**Figure S9.** Representative TGA curve of compound  $\text{Gd}(\text{CPOMBA})(\text{H}_2\text{O})_2 \cdot n\text{H}_2\text{O}$ .

**Section S7. Excitation and Emission spectra of free ligand single and doping LnMOF**

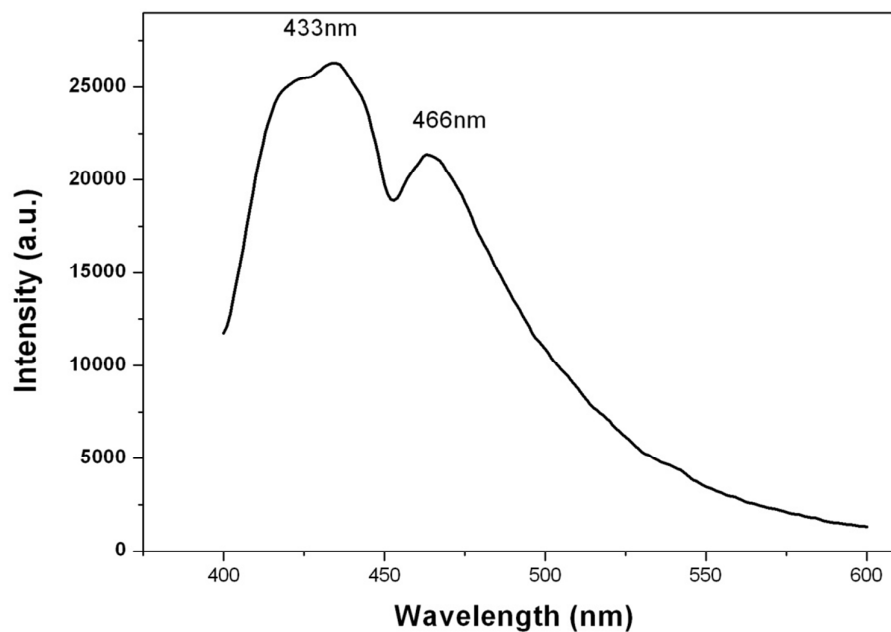

**Figure S10.** Emission spectra of  $\text{La}(\text{CPOMBA})(\text{H}_2\text{O})_2 \cdot n\text{H}_2\text{O}$  under excitation of 362nm

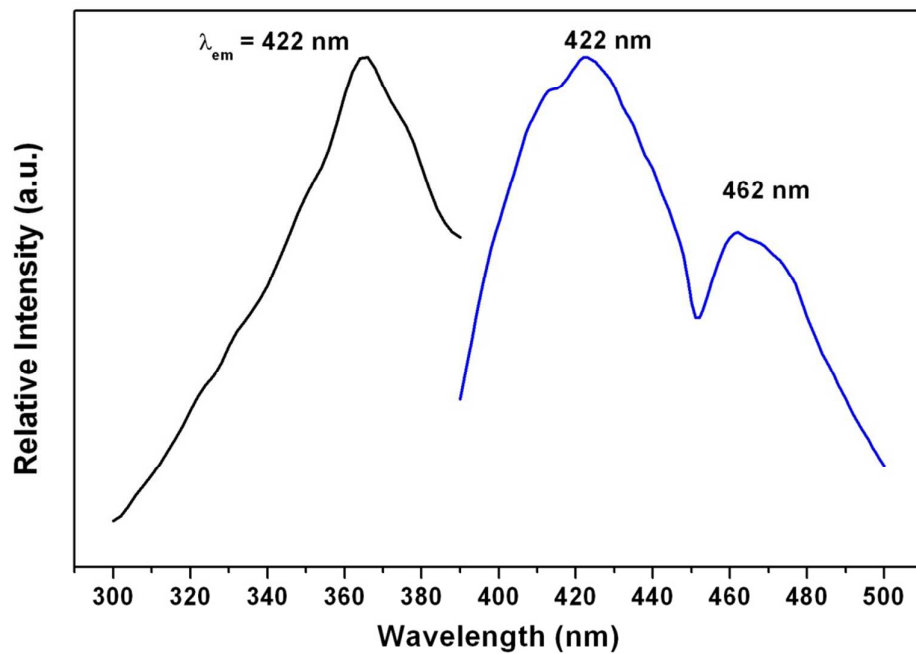

**Figure S11.** Excitation and emission spectra of free ligand  $\text{H}_3\text{CPOMBA}$

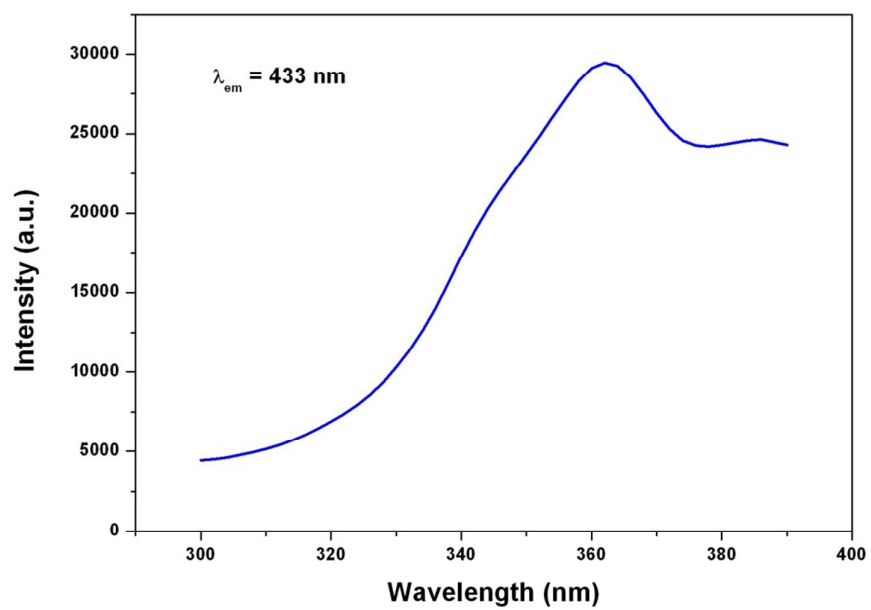

**Figure S12.** Excitation spectra of LaCPOMBA

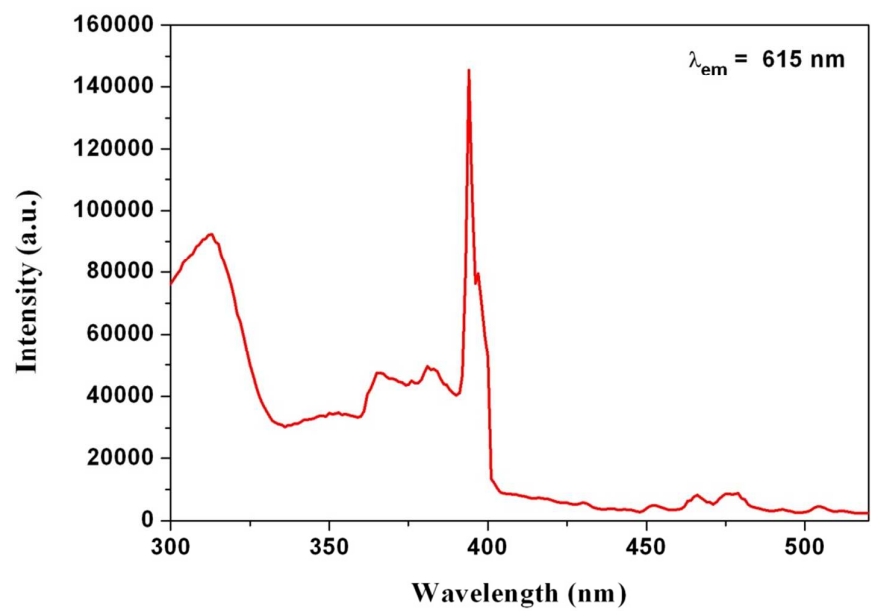

**Figure S13.** Excitation spectra of EuCPOMBA

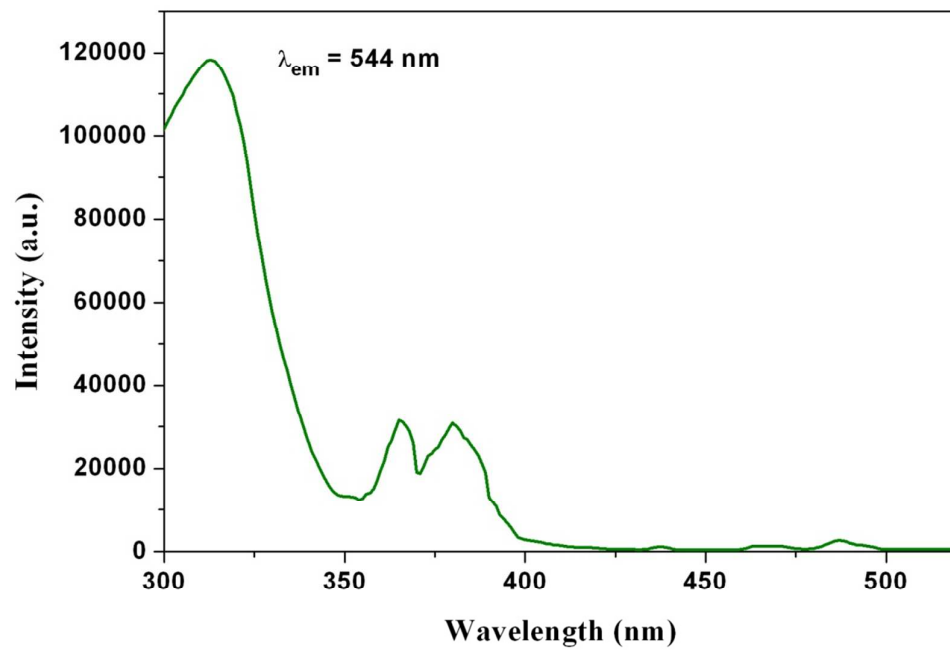

**Figure S14.** Excitation spectra of TbCPOMBA

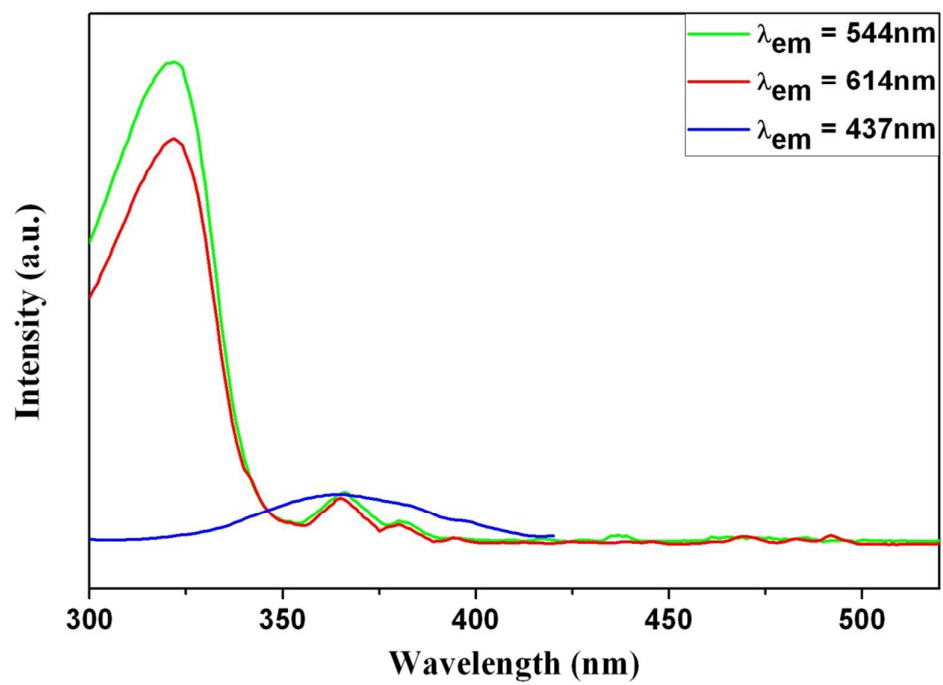

**Figure S15.** Excitation spectra of Eu<sub>0.045</sub>Tb<sub>0.955</sub>CPOMBA

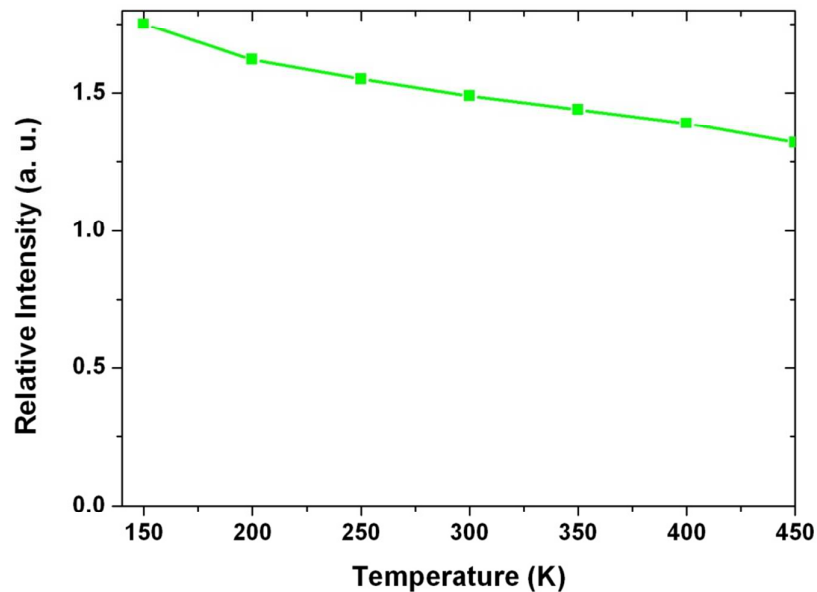

**Figure S16.** Emission spectra ( $\lambda_{\text{ex}} = 365\text{nm}$ ) of  $\text{Eu}_{0.045}\text{Tb}_{0.955}\text{CPOMBA}$  at different temperature.

#### Section S8. CIE coordinates of doping LnMOF

**Table S4.** CIE coordinates for the  $\text{Eu}_x\text{Tb}_{1-x}\text{-CPOMBA}$  ( $x = 0\text{-}20$  mol%) excited at 324 nm.

| Molar ratio of $\text{Eu}^{3+}:\text{Tb}^{3+}$ | CIE coordinates  |
|------------------------------------------------|------------------|
| 0.5% : 99.5%                                   | (0.2989, 0.5882) |
| 4.5% : 95.5%                                   | (0.4264, 0.4913) |
| 7.5% : 99%                                     | (0.488, 0.4441)  |
| 10% : 90%                                      | (0.5093, 0.4342) |
| 15% : 85%                                      | (0.5735, 0.4003) |
| 20% : 80%                                      | (0.5771, 0.3861) |

**Table S5.** CIE coordinates for the  $\text{Eu}_{0.045}\text{Tb}_{0.955}\text{CPOMBA}$  excited from 330 nm to 370nm.

| Wavelength of excitation | CIE coordinates  |
|--------------------------|------------------|
| 330nm                    | (0.4661, 0.4775) |
| 340nm                    | (0.4589, 0.4521) |
| 350nm                    | (0.419, 0.3983)  |
| 355nm                    | (0.3774, 0.3526) |
| 360nm                    | (0.3636, 0.3469) |
| 365nm                    | (0.333, 0.32)    |
| 370nm                    | (0.2771, 0.2598) |

**Table S6.** CIE coordinates for the  $\text{La}_x\text{Eu}_y\text{Tb}_{1-x-y}\text{-CPOMBA}$  excited at 324 nm.

| Molar ratio of $\text{La}^{3+}:\text{Eu}^{3+}:\text{Tb}^{3+}$ | CIE coordinates  |
|---------------------------------------------------------------|------------------|
| 94%: 3%: 3%                                                   | (0.3476, 0.5216) |
| 60%: 10%: 30%                                                 | (0.3919, 0.5240) |
| 60%: 22%: 18%                                                 | (0.4354, 0.4633) |
| 60%: 25%: 15%                                                 | (0.4971, 0.421)  |
| 55%: 25%: 15%                                                 | (0.4657, 0.4554) |
| 35%: 30%: 25%                                                 | (0.55, 0.4052)   |
| 25%: 40%: 35%                                                 | (0.5957, 0.3747) |

**Table S7.** CIE coordinates for the  $\text{La}_{0.6}\text{Eu}_{0.1}\text{Tb}_{0.3}\text{-CPOMBA}$  excited from 330 nm to 390nm.

| Wavelength of excitation | CIE coordinates  |
|--------------------------|------------------|
| 330nm                    | (0.397, 0.5228)  |
| 340nm                    | (0.3928, 0.4862) |
| 350nm                    | (0.3783, 0.4027) |
| 360nm                    | (0.3569, 0.3567) |
| 370nm                    | (0.3377, 0.3481) |
| 380nm                    | (0.323, 0.326)   |
| 390nm                    | (0.3194, 0.3098) |

### Section S9. Photoluminescent decay curve of doping LnMOF

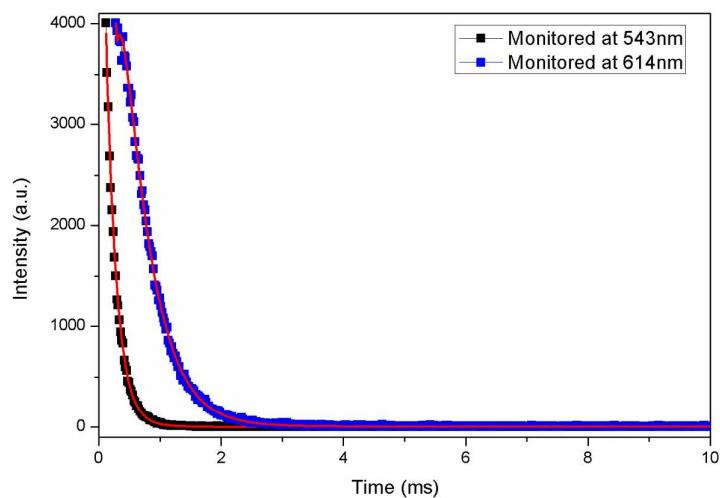

**Figure S17.** The PL decay curve of  $\text{Eu}_{0.045}\text{Tb}_{0.955}\text{CPOMBA}$  recorded at room



temperature with emission monitored by the  $^5D_4 \rightarrow ^7F_5$  transition at 543 nm and the  $^5D_0 \rightarrow ^7F_2$  transition at 614 nm ( $\lambda_{\text{ex}} = 365$  nm). The red lines are the best fit to the data using a two-exponential function, giving the average values of  $\tau_{\text{Tb}^{3+}} = 0.176$  ms and  $\tau_{\text{Eu}^{3+}} = 0.656$  ms.

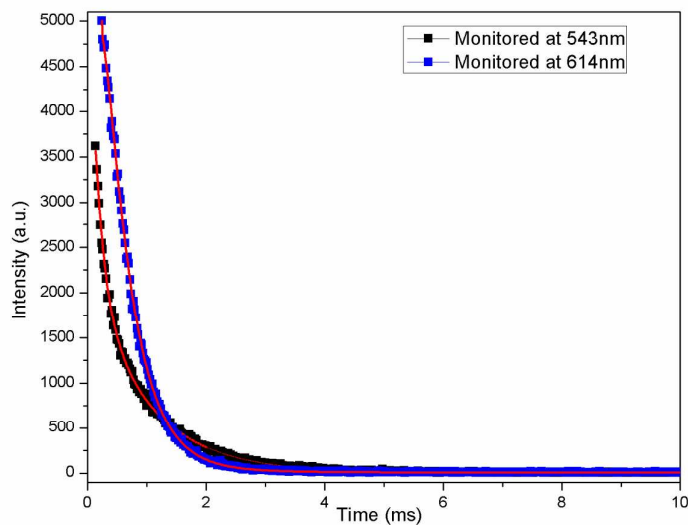

**Figure S18** The PL decay curve of  $\text{La}_{0.6}\text{Eu}_{0.1}\text{Tb}_{0.3}\text{-CPOMBA}$  recorded at room temperature with emission monitored by the  $^5D_4 \rightarrow ^7F_5$  transition at 543 nm and the  $^5D_0 \rightarrow ^7F_2$  transition at 614 nm ( $\lambda_{\text{ex}} = 380$  nm). The red lines are the best fit to the data using a two-exponential function, giving the average values of  $\tau_{\text{Tb}^{3+}} = 0.579$  ms and  $\tau_{\text{Eu}^{3+}} = 0.556$  ms.

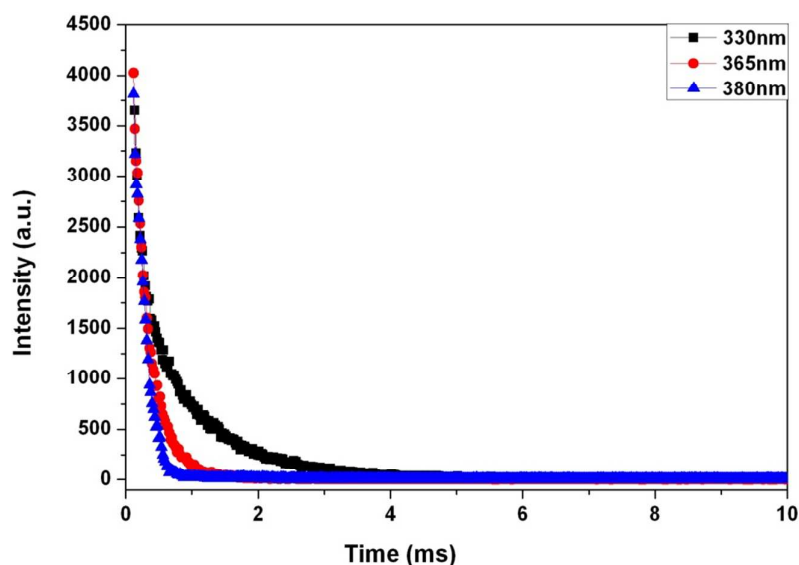

**Figure S19.** The PL decay curve of Eu<sub>0.045</sub>Tb<sub>0.955</sub>CPOMBA recorded at room temperature with emission monitored by the <sup>5</sup>D<sub>4</sub>→<sup>7</sup>F<sub>5</sub> transition at 543 nm under different excitation wavelength (330nm, 365nm, 380nm).

#### Section S10 quantum yield of doping LnMOF

The measurement and calculation for quantum yield for Eu<sub>0.045</sub>Tb<sub>0.955</sub>CPOMBA/ La<sub>0.6</sub>Eu<sub>0.1</sub>Tb<sub>0.3</sub>CPOMBA sample

- Measure the blank laser excitation line (E<sub>blank</sub>) from 360 to 370 nm for Eu<sub>0.045</sub>Tb<sub>0.955</sub>CPOMBA and from 375 to 385nm for La<sub>0.6</sub>Eu<sub>0.1</sub>Tb<sub>0.3</sub>CPOMBA.
- Put the sample on the sample hold in the integrating sphere. Then the emission spectra in the range of 400-705 nm were collected. Every spectrum was scanned at least 5 times. The spectrum from 360 to 370 nm (or from 375nm to 385nm) is E<sub>S</sub>, and from 400 to 705 nm is L<sub>S</sub>, respectively.
- Then the quantum yields (QY) are calculated with the software supplied by the manufacturer based on the equation 1. The η here refers to the QY of the emission from 400 to 705 nm.

$$\eta = \frac{\int L_S}{\int E_{blank} - \int E_S}$$

The raw data used for the calculation of quantum yield of Eu<sub>0.045</sub>Tb<sub>0.955</sub>CPOMBA/ La<sub>0.6</sub>Eu<sub>0.1</sub>Tb<sub>0.3</sub>CPOMBA sample are listed in the following table S8.

**Table S8.** The raw data for the calculation of Eu<sub>0.045</sub>Tb<sub>0.955</sub>CPOMBA/ La<sub>0.6</sub>Eu<sub>0.1</sub>Tb<sub>0.3</sub>CPOMBA sample

| sample                                                       | ∫E <sub>blank</sub> | ∫E <sub>S</sub> | ∫L <sub>S</sub> | η (%)    |
|--------------------------------------------------------------|---------------------|-----------------|-----------------|----------|
| Eu <sub>0.045</sub> Tb <sub>0.955</sub> CPOMBA               | 451911.5            | 300790.4        | 22668.1         | 15±0.2   |
| La <sub>0.6</sub> Eu <sub>0.1</sub> Tb <sub>0.3</sub> CPOMBA | 417582.8            | 284368.5        | 19182.8         | 14.4±0.3 |

## Section S11. Photographs of LEDs and optical photographs of crystal

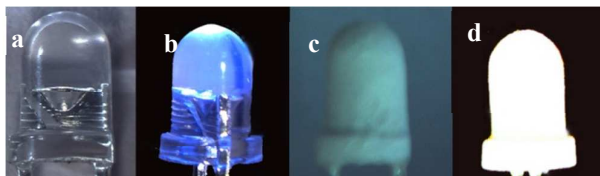

**Figure S20.** Photographs of LEDs: A 3 mm reference UV LED (365nm) turned off (a) and on (b); the same LED coated with a thin layer of compound  $\text{Eu}_{0.045}\text{Tb}_{0.955}\text{CPOMBA}$  turned off (c) and on (d).

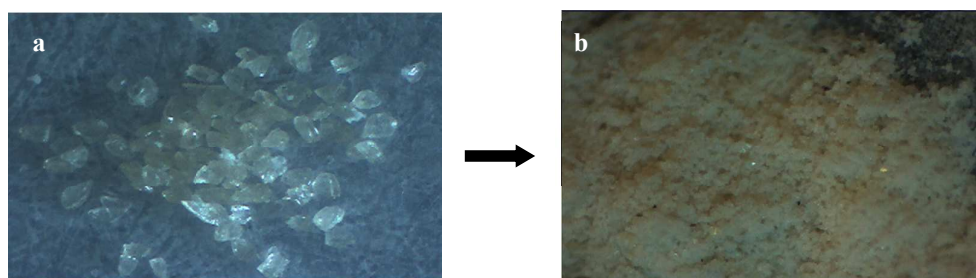

**Figure S21.** Optical photographs of representative  $\text{Eu}_{0.045}\text{Tb}_{0.955}\text{CPOMBA}$  crystal sample in natural light before (a) and after (b) grinding.

## Section S12. Fabrication of UV WLED

**Method I.** As described by He et al<sup>2</sup>, crystal compound  $\text{Eu}_{0.045}\text{Tb}_{0.955}\text{CPOMBA}$  (5mg) was put into an agate mortar and manually ground with the pestle until the crystal particle completely become powder. Following on this, 1mL anhydrous ethanol was added into the mortar, which was continued to be ground. When the solid-liquid mixture was uniformly blended, a commercially available n-UV LED lamp (365nm) was covered with the mixture by a dropper. After several times repeating on the above procure, an even coatings on the WLED was fabricated, which was used directly after drying.

**Method II.** white LEDs with various concentrations and particle size (Table 1) were fabricated with 365nm GaN chip and  $\text{Eu}_{0.045}\text{Tb}_{0.955}\text{CPOMBA}$  phosphor. The chip was first fixed at the center of LED substrate. The 365nm UV chip was coated on different proportion mixture of phosphor and silicone, and baked 30 minutes in 160°C oven, then filled lens up with silicone (different from aforementioned silicone) and baked 2 h in 120°C oven. The photoelectric properties of the fabricated LEDs were measured by an integrating sphere spectroradiometer system (HP-8000, Hopoo, China).

## References

- (1) Runge, E.; Gross, E. K. U. Density-Functional Theory for Time-Dependent Systems, *Phys. Rev. Lett.* **1984**, *52*, 997-1000.
- (2) He, J.; Zeller, M.; Hunter, A. D.; Xu, Z. White Light Emission and Second Harmonic Generation from Secondary Group Participation (SGP) in a Coordination Network. *J. Am. Chem. Soc.* **2012**, *134*, 1553-1559.
